# Supplementary material for: Ca2+–Calmodulin Dependent Wound Repair in Dictyostelium Cell Membrane
Source: PubMed Central journal article supplement (PMC7226253; doi:10.3390/cells9041058), 2020-04-23
Supplement: cells-09-01058-s001.pdf [file cells-09-01058-s001.pdf]

1 Article

# 2 $\text{Ca}^{2+}$ -Calmodulin Dependent Wound Repair in 3 *Dictyostelium* Cell Membrane

4 Md. Shahabe Uddin Talukder <sup>1,2</sup>, Mst. Shaela Pervin <sup>1,3</sup>, Md. Istiaq Obaidi Tanvir <sup>1</sup>, Koushiro  
5 Fujimoto <sup>1</sup>, Masahito Tanaka <sup>1</sup>, Go Itoh<sup>4</sup>, and Shigehiko Yumura <sup>1\*</sup>

6 <sup>1</sup> Graduate School of Sciences and Technology for Innovation, Yamaguchi University, Yamaguchi 753-8511,  
7 Japan; shahabeuddin@yahoo.com (M.S.U.T.); sprvn@yahoo.com (M.S.P.); tanviristiaq@gmail.com  
8 (M.I.O.T.); i501wz@yamaguchi-u.ac.jp (K.F.); g003wf@yamaguchi-u.ac.jp (M.T.); yumura@yamaguchi-  
9 u.ac.jp (S.Y.)

10 <sup>2</sup> Institute of Food and Radiation Biology, AERE, Bangladesh Atomic Energy Commission, Bangladesh.

11 <sup>3</sup> Rajshahi Diabetic Association General Hospital, Luxmipur, Jhautala, Rajshahi-6000, Bangladesh.

12 <sup>4</sup> Department of Molecular Medicine and Biochemistry, Akita University Graduate School of Medicine,  
13 Akita, 010-8543, Japan; goitoh@med.akita-u.ac.jp (G.I.)

14 \* Correspondence: yumura@yamaguchi-u.ac.jp (S.Y.); Tel.: +81-83-933-5717; Fax: +81-83-933-5717  
15

## 16 Supplemental Data

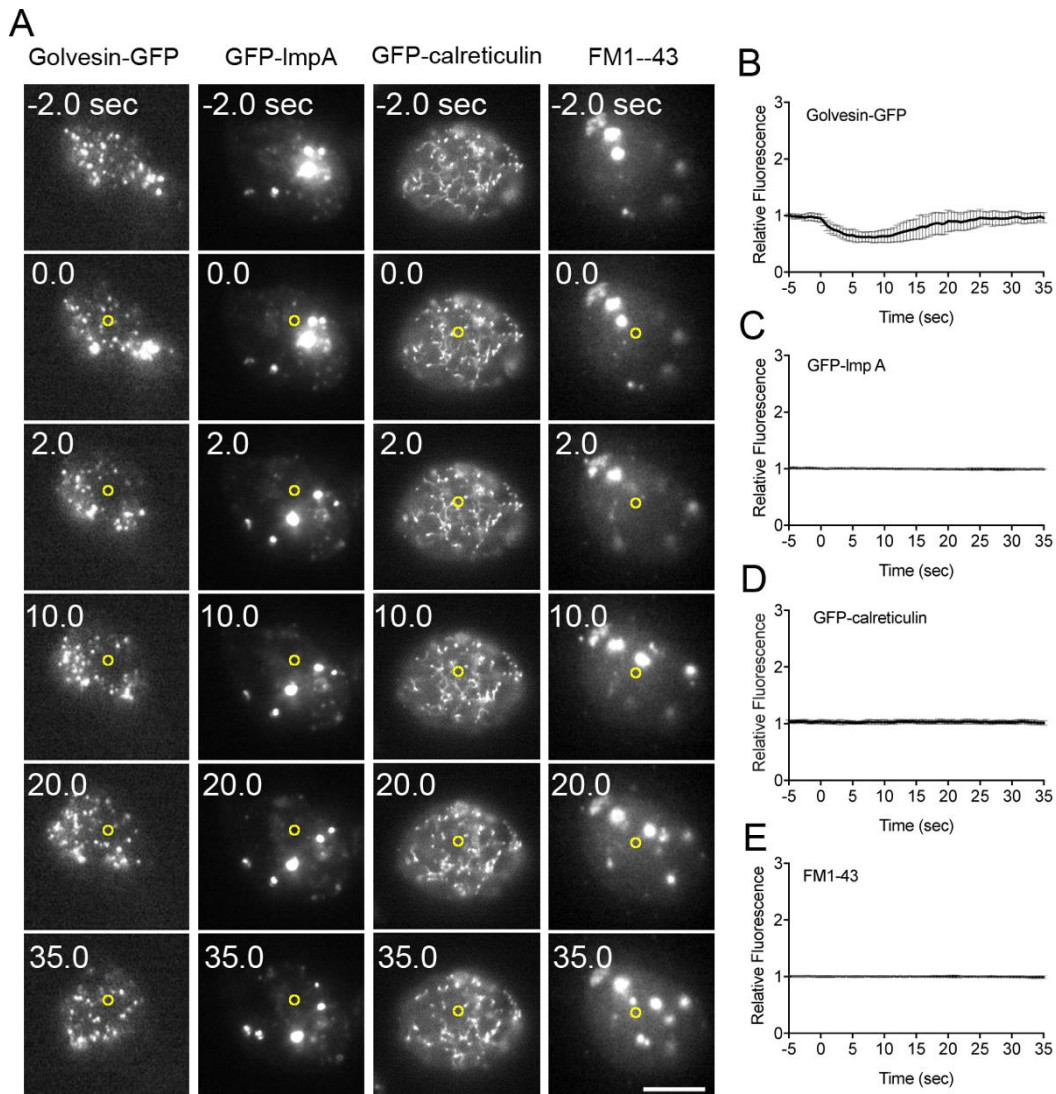

17

18 **Supplemental Figure S1.** Golgi-derived vesicles, lysosome, endoplasmic reticulum, and recycling  
19 endosomes did not accumulate at the wound site. (A) Typical fluorescence images under TIRF  
20 microscopy when cells expressing golvesin-GFP, GFP-lmpA, or GFP-calreticulin, and FM dye-stained  
21 cells were wounded by laserporation (yellow circles). To visualize the recycling endosomes, 30 min  
22 after the cells were incubated with FM1-43, they were washed by media exchange. Bars, 10  $\mu\text{m}$ . (B-E)  
23 Time courses of fluorescence intensity of each probe at wound site (n = 25, each). Note that golvesin-  
24 GFP transiently disappeared from the wound site after wounding.

25

26
